# Supplementary material for: Bayesian Network Structure Learning from Incomplete Breast Cancer Data Using Structural Expectation–Maximization
Source: Research Square preprint supplement (doi:10.21203/rs.3.rs-8124060/v1), 2025-12-10
Supplement: Supplementary file 1 [file 6a644e2893cd99b454e2076e.pdf]

## Appendix A

**Table A1** Performance comparison between SEM and MICE under simulated missingness scenarios with 5 variables and 5000 samples.

| Mechanism | Proportion | Metrics   | SEM    | MICE   | Wilcoxon $p$ -value | Bootstrap CI       |
|-----------|------------|-----------|--------|--------|---------------------|--------------------|
| MCAR      | 0.15       | Precision | 0.7587 | 0.7543 | 0.8339              | (-0.0043, 0.029)   |
|           |            | Recall    | 0.7606 | 0.7569 | 0.8339              | (-0.0046, 0.0022)  |
|           |            | F1-score  | 0.7596 | 0.7555 | 0.8339              | (-0.0044, 0.026)   |
| MCAR      | 0.3        | Precision | 0.7772 | 0.7821 | 0.5169              | (-0.023, 0.0107)   |
|           |            | Recall    | 0.7816 | 0.7875 | 0.323               | (-0.0208, 0.0072)  |
|           |            | F1-score  | 0.7792 | 0.7845 | 0.5004              | (-0.0204, 0.0094)  |
| MCAR      | 0.5        | Precision | 0.7695 | 0.7707 | 0.777               | (-0.028, 0.032)    |
|           |            | Recall    | 0.7704 | 0.7771 | 0.8719              | (-0.027, 0.029)    |
|           |            | F1-score  | 0.7699 | 0.7706 | 0.778               | (-0.0262, 0.0322)  |
| MAR       | 0.15       | Precision | 0.7879 | 0.7804 | 0.7213              | (-0.0161, 0.0435)  |
|           |            | Recall    | 0.7915 | 0.7847 | 0.7213              | (-0.0145, 0.0421)  |
|           |            | F1-score  | 0.7894 | 0.7822 | 0.7213              | (-0.0163, 0.0432)  |
| MAR       | 0.3        | Precision | 0.736  | 0.7568 | 0.213               | (-0.0542, 0.0143)  |
|           |            | Recall    | 0.7915 | 0.7847 | 0.7213              | (-0.0145, 0.0421)  |
|           |            | F1-score  | 0.7894 | 0.7822 | 0.7213              | (-0.0163, 0.0432)  |
| MAR       | 0.5        | Precision | 0.7399 | 0.7445 | 0.7476              | (-0.0448, 0.0342)  |
|           |            | Recall    | 0.7442 | 0.7489 | 0.7987              | (-0.0445, 0.0307)  |
|           |            | F1-score  | 0.7418 | 0.7464 | 0.7817              | (-0.0437, 0.0332)  |
| MNAR      | 0.15       | Precision | 0.7229 | 0.7185 | 0.476               | (-0.0077, 0.0162)  |
|           |            | Recall    | 0.7304 | 0.725  | 0.439               | (-0.0049, 0.0184)  |
|           |            | F1-score  | 0.7264 | 0.7215 | 0.476               | (-0.0068, 0.0169)  |
| MNAR      | 0.3        | Precision | 0.7476 | 0.7342 | 0.4201              | (-0.0085, 0.0437)  |
|           |            | Recall    | 0.7518 | 0.7384 | 0.3922              | (-0.0075, 0.0419)  |
|           |            | F1-score  | 0.7494 | 0.7326 | 0.3932              | (-0.00087, 0.0431) |
| MNAR      | 0.5        | Precision | 0.7463 | 0.752  | 0.875               | (-0.046, 0.0316)   |
|           |            | Recall    | 0.7531 | 0.7576 | 0.967               | (-0.0417, 0.033)   |
|           |            | F1-score  | 0.7494 | 0.7544 | 0.923               | (-0.0452, 0.031)   |

**Table A2** Performance comparison between SEM and MICE under simulated missingness scenarios with 10 variables and 1000 samples.

| Mechanism | Proportion | Metrics   | SEM    | MICE   | Wilcoxon $p$ -value | Bootstrap CI      |
|-----------|------------|-----------|--------|--------|---------------------|-------------------|
| MCAR      | 0.15       | Precision | 0.8265 | 0.8037 | 0.0322              | (0.0032, 0.0439)  |
|           |            | Recall    | 0.8162 | 0.79   | 0.0073              | (0.0074, 0.0487)  |
|           |            | F1-score  | 0.821  | 0.7964 | 0.0188              | (0.0058, 0.0471)  |
| MCAR      | 0.3        | Precision | 0.8441 | 0.8264 | 0.049               | (-0.0076, 0.041)  |
|           |            | Recall    | 0.829  | 0.7922 | 0.0008              | (0.0095, 0.0615)  |
|           |            | F1-score  | 0.8361 | 0.8082 | 0.006               | (0.0023, 0.0514)  |
| MCAR      | 0.5        | Precision | 0.8361 | 0.8139 | 0.055               | (-0.003, 0.0505)  |
|           |            | Recall    | 0.8162 | 0.7711 | 0.0011              | (0.0165, 0.074)   |
|           |            | F1-score  | 0.8256 | 0.7909 | 0.0084              | (0.007, 0.0626)   |
| MAR       | 0.15       | Precision | 0.8247 | 0.8231 | 0.6094              | (-0.0265, 0.0246) |
|           |            | Recall    | 0.8174 | 0.8086 | 0.3273              | (-0.0177, 0.0341) |
|           |            | F1-score  | 0.8207 | 0.8155 | 0.4362              | (-0.0201, 0.0303) |
| MAR       | 0.3        | Precision | 0.8278 | 0.8299 | 0.639               | (-0.0225, 0.0186) |
|           |            | Recall    | 0.8165 | 0.8036 | 0.117               | (-0.0091, 0.0349) |
|           |            | F1-score  | 0.8219 | 0.816  | 0.242               | (-0.0165, 0.0255) |
| MAR       | 0.5        | Precision | 0.8416 | 0.7951 | 0.0002              | (0.0144, 0.075)   |
|           |            | Recall    | 0.8246 | 0.749  | 4.9E-06             | (0.0429, 0.1099)  |
|           |            | F1-score  | 0.8327 | 0.7704 | 0.1.63E-05          | (0.0322, 0.0924)  |
| MNAR      | 0.15       | Precision | 0.8317 | 0.8121 | 0.045               | (0.0002, 0.0405)  |
|           |            | Recall    | 0.8201 | 0.7994 | 0.049               | (0.0013, 0.0426)  |
|           |            | F1-score  | 0.8256 | 0.8053 | 0.052               | (0.0004, 0.0408)  |
| MNAR      | 0.3        | Precision | 0.8422 | 0.8204 | 0.078               | (-0.0013, 0.0476) |
|           |            | Recall    | 0.8314 | 0.7949 | 0.004               | (0.0145, 0.0618)  |
|           |            | F1-score  | 0.8365 | 0.8069 | 0.014               | (0.0058, 0.0557)  |
| MNAR      | 0.5        | Precision | 0.8464 | 0.8151 | 0.0228              | (0.0073, 0.0578)  |
|           |            | Recall    | 0.8266 | 0.7707 | 0.0001              | (0.0323, 0.0822)  |
|           |            | F1-score  | 0.836  | 0.7917 | 0.0008              | (0.0225, 0.0703)  |

**Table A3** Performance comparison between SEM and MICE under simulated missingness scenarios with 10 variables and 5000 samples.

| Mechanism | Proportion | Metrics   | SEM    | MICE   | Wilcoxon $p$ -value | Bootstrap CI      |
|-----------|------------|-----------|--------|--------|---------------------|-------------------|
| MCAR      | 0.15       | Precision | 0.7961 | 0.7902 | 0.7241              | (-0.0125, 0.0248) |
|           |            | Recall    | 0.8165 | 0.8161 | 0.9885              | (-0.0145, 0.0144) |
|           |            | F1-score  | 0.8056 | 0.8023 | 0.8644              | (-0.0122, 0.02)   |
| MCAR      | 0.3        | Precision | 0.7937 | 0.7932 | 0.5663              | (-0.0311, 0.0262) |
|           |            | Recall    | 0.8153 | 0.8157 | 0.6811              | (-0.0288, 0.0206) |
|           |            | F1-score  | 0.8038 | 0.8038 | 0.5505              | (-0.0289, 0.0226) |
| MCAR      | 0.5        | Precision | 0.8128 | 0.8167 | 0.8125              | (-0.0305, 0.0185) |
|           |            | Recall    | 0.833  | 0.8348 | 0.8875              | (-0.0234, 0.0189) |
|           |            | F1-score  | 0.8222 | 0.8252 | 0.911               | (-0.0292, 0.0195) |
| MAR       | 0.15       | Precision | 0.7666 | 0.7756 | 0.2641              | (-0.0329, 0.0104) |
|           |            | Recall    | 0.795  | 0.8017 | 0.2886              | (-0.024, 0.0113)  |
|           |            | F1-score  | 0.7799 | 0.7878 | 0.2758              | (-0.0259, 0.012)  |
| MAR       | 0.3        | Precision | 0.7923 | 0.7827 | 0.2977              | (-0.0087, 0.0309) |
|           |            | Recall    | 0.8144 | 0.8069 | 0.2355              | (-0.0075, 0.0251) |
|           |            | F1-score  | 0.8026 | 0.794  | 0.2326              | (-0.0081, 0.0278) |
| MAR       | 0.5        | Precision | 0.8085 | 0.7993 | 0.4337              | (-0.0178, 0.0372) |
|           |            | Recall    | 0.824  | 0.8183 | 0.054               | (-0.0187, 0.0293) |
|           |            | F1-score  | 0.8158 | 0.8082 | 0.04                | (-0.0165, 0.0334) |
| MNAR      | 0.15       | Precision | 0.7969 | 0.7812 | 0.0359              | (-0.0038, 0.0344) |
|           |            | Recall    | 0.82   | 0.8047 | 0.04                | (-0.0012, 0.0314) |
|           |            | F1-score  | 0.8077 | 0.7222 | 0.035               | (-0.0028, 0.0338) |
| MNAR      | 0.3        | Precision | 0.7816 | 0.7733 | 0.3388              | (-0.0115, 0.03)   |
|           |            | Recall    | 0.8066 | 0.8019 | 0.5718              | (-0.0148, 0.0232) |
|           |            | F1-score  | 0.7932 | 0.7867 | 0.3876              | (-0.0135, 0.0253) |
| MNAR      | 0.5        | Precision | 0.8103 | 0.7866 | 0.1611              | (-0.0128, 0.0587) |
|           |            | Recall    | 0.8293 | 0.8074 | 0.1195              | (-0.0072, 0.0516) |
|           |            | F1-score  | 0.8193 | 0.7964 | 0.1449              | (-0.0087, 0.0565) |

**Table A4** Performance comparison between SEM and MICE under simulated missingness scenarios with 20 variables and 1000 samples.

| Mechanism | Proportion | Metrics   | SEM    | MICE   | Wilcoxon $p$ -value | Bootstrap CI      |
|-----------|------------|-----------|--------|--------|---------------------|-------------------|
| MCAR      | 0.15       | Precision | 0.8812 | 0.8697 | 0.1178              | (-0.0029, 0.0248) |
|           |            | Recall    | 0.8573 | 0.8464 | 0.1366              | (-0.0036, 0.0261) |
|           |            | F1-score  | 0.8688 | 0.8575 | 0.1505              | (-0.0036, 0.0254) |
| MCAR      | 0.3        | Precision | 0.8842 | 0.874  | 0.036               | (-0.0044, 0.0238) |
|           |            | Recall    | 0.8675 | 0.8485 | 0.0072              | (0.0002, 0.0353)  |
|           |            | F1-score  | 0.8754 | 0.8607 | 0.0132              | (-0.0017, 0.03)   |
| MCAR      | 0.5        | Precision | 0.8883 | 0.8769 | 0.047               | (-0.0032, 0.0253) |
|           |            | Recall    | 0.8723 | 0.8458 | 0.001               | (0.0104, 0.0443)  |
|           |            | F1-score  | 0.88   | 0.8606 | 0.005               | (0.0031, 0.0341)  |
| MAR       | 0.15       | Precision | 0.8854 | 0.7824 | 0.034               | (-0.001, 0.028)   |
|           |            | Recall    | 0.869  | 0.8502 | 0.022               | (0.0027, 0.0371)  |
|           |            | F1-score  | 0.8768 | 0.8606 | 0.029               | (0.0014, 0.0325)  |
| MAR       | 0.3        | Precision | 0.884  | 0.8757 | 0.06                | (-0.0055, 0.0211) |
|           |            | Recall    | 0.8671 | 0.8483 | 0.0014              | (0.0011, 0.034)   |
|           |            | F1-score  | 0.8751 | 0.8613 | 0.0069              | (-0.0005, 0.0281) |
| MAR       | 0.5        | Precision | 0.8847 | 0.8702 | 0.021               | (0.0027, 0.0285)  |
|           |            | Recall    | 0.862  | 0.8308 | 9.06E-05            | (0.0172, 0.0456)  |
|           |            | F1-score  | 0.8728 | 0.8494 | 6.0E-04             | (0.0098, 0.0365)  |
| MNAR      | 0.15       | Precision | 0.8889 | 0.8894 | 0.5517              | (-0.0147, 0.0118) |
|           |            | Recall    | 0.8639 | 0.8628 | 0.2118              | (-0.0152, 0.0166) |
|           |            | F1-score  | 0.8758 | 0.8755 | 0.295               | (-0.0152, 0.0148) |
| MNAR      | 0.3        | Precision | 0.8856 | 0.8722 | 0.065               | (-0.0057, 0.032)  |
|           |            | Recall    | 0.8573 | 0.8361 | 0.248               | (-0.0016, 0.0445) |
|           |            | F1-score  | 0.8708 | 0.8532 | 0.045               | (-0.0041, 0.0376) |
| MNAR      | 0.5        | Precision | 0.9012 | 0.8587 | 5.01E-06            | (0.024, 0.0629)   |
|           |            | Recall    | 0.8774 | 0.8142 | 1.03E-07            | (0.0414, 0.0865)  |
|           |            | F1-score  | 0.8888 | 0.8352 | 2.34E-07            | (0.0334, 0.0763)  |

**Table A5** Performance comparison between SEM and MICE under simulated missingness scenarios with 20 variables and 5000 samples.

| Mechanism | Proportion | Metrics   | SEM    | MICE   | Wilcoxon $p$ -value | Bootstrap CI      |
|-----------|------------|-----------|--------|--------|---------------------|-------------------|
| MCAR      | 0.15       | Precision | 0.8615 | 0.8514 | 0.198               | (0.0014, 0.0249)  |
|           |            | Recall    | 0.8794 | 0.8704 | 0.148               | (0.0012, 0.0215)  |
|           |            | F1-score  | 0.8701 | 0.8606 | 0.138               | (0.0013, 0.0226)  |
| MCAR      | 0.3        | Precision | 0.8876 | 0.8705 | 0.2642              | (-0.0006, 0.0416) |
|           |            | Recall    | 0.9002 | 0.8843 | 0.1843              | (0.001, 0.0377)   |
|           |            | F1-score  | 0.8937 | 0.8772 | 0.2026              | (0.0007, 0.0408)  |
| MCAR      | 0.5        | Precision | 0.879  | 0.8789 | 0.723               | (-0.0221, 0.0225) |
|           |            | Recall    | 0.8924 | 0.8921 | 0.79                | (-0.0193, 0.0183) |
|           |            | F1-score  | 0.8855 | 0.8853 | 0.787               | (-0.0215, 0.0202) |
| MAR       | 0.15       | Precision | 0.8414 | 0.843  | 0.93                | (-0.0155, 0.0112) |
|           |            | Recall    | 0.8593 | 0.8606 | 0.94                | (-0.0157, 0.0102) |
|           |            | F1-score  | 0.85   | 0.8515 | 0.94                | (-0.0146, 0.0108) |
| MAR       | 0.3        | Precision | 0.8809 | 0.8713 | 0.222               | (-0.0068, 0.0268) |
|           |            | Recall    | 0.894  | 0.8826 | 0.182               | (-0.0024, 0.0272) |
|           |            | F1-score  | 0.8873 | 0.8768 | 0.208               | (-0.0049, 0.0266) |
| MAR       | 0.5        | Precision | 0.8785 | 0.873  | 0.524               | (-0.014, 0.0259)  |
|           |            | Recall    | 0.8921 | 0.8842 | 0.037               | (-0.0093, 0.0265) |
|           |            | F1-score  | 0.8851 | 0.8784 | 0.058               | (-0.0113, 0.0261) |
| MNAR      | 0.15       | Precision | 0.8768 | 0.8423 | 0.0262              | (0.0021, 0.0281)  |
|           |            | Recall    | 0.888  | 0.8782 | 0.043               | (0.0001, 0.0226)  |
|           |            | F1-score  | 0.8826 | 0.87   | 0.034               | (0.0012, 0.0268)  |
| MNAR      | 0.3        | Precision | 0.8961 | 0.8568 | 0.0008              | (0.0198, 0.0671)  |
|           |            | Recall    | 0.9064 | 0.8704 | 0.0007              | (0.0186, 0.0616)  |
|           |            | F1-score  | 0.9011 | 0.8634 | 0.001               | (0.0207, 0.0653)  |
| MNAR      | 0.5        | Precision | 0.895  | 0.8808 | 0.046               | (-0.0021, 0.0346) |
|           |            | Recall    | 0.9056 | 0.8911 | 0.008               | (0.0018, 0.0318)  |
|           |            | F1-score  | 0.9001 | 0.8858 | 0.012               | (-0.0007, 0.0329) |
